# Supplementary material
Source: MDPI journal article supplement (https://www.mdpi.com/2073-4352/12/2/201)
Supplement: s1 [file s1]

# Salification Controls the In-Vitro Release of Theophylline

Laura Baraldi <sup>1,2</sup>, Luca Fornasari <sup>2</sup>, Irene Bassanetti <sup>2</sup>, Francesco Amadei <sup>2</sup>, Alessia Bacchi <sup>1,3</sup> and Luciano Marchiò <sup>1,3</sup>

<sup>1</sup> Dipartimento di Scienze Chimiche, della Vita e della Sostenibilità Ambientale, Università di Parma, 43124 Parma, Italy; laura.baraldi@unipr.it (L.B.); alessia.bacchi@unipr.it (A.B.)

<sup>2</sup> Preclinical Analytics and Early Formulations Department, Chiesi Farmaceutici S.p.A., Largo Belloli, 43123 Parma, Italy; l.fornasari@chiesi.com (L.F.); i.bassanetti@chiesi.com (I.B.); f.amadei@chiesi.com (F.A.)

<sup>3</sup> Biopharmanet TEC, Tecnopolo Padiglione 33, Università di Parma, 43124 Parma, Italy

\* Correspondence: luciano.marchio@unipr.it

## Table of contents

|                                                                                                                                             |   |
|---------------------------------------------------------------------------------------------------------------------------------------------|---|
| <b>Table S1.</b> Summary of crystallographic data for Theophylline Squarate trihydrate (TS3w).                                              | 2 |
| <b>Figure S1.</b> DSC thermogram of TS3w (10°C/min).                                                                                        | 3 |
| <b>Figure S2.</b> TGA thermogram of TS3w (10°C/min).                                                                                        | 3 |
| <b>Figure S3.</b> DVS of TS3w.                                                                                                              | 4 |
| <b>Figure S4.</b> XRPD of TS3w after DVS compared to its pattern before DVS.                                                                | 4 |
| <b>Figure S5.</b> DSC thermogram of TSan (10°C/min).                                                                                        | 5 |
| <b>Figure S6.</b> TGA thermogram of TSan (10°C/min).                                                                                        | 5 |
| <b>Figure S7.</b> FTIR spectra of Theophylline, Squaric Acid and TS3w                                                                       | 6 |
| <b>Figure S8.</b> Asymmetric unit of Theophylline squarate trihydrate and molecular structure highlighting the HB connections and distances | 7 |
| <b>Figure S9.</b> VH-XRPD of pure Theophylline.                                                                                             | 8 |

| Crystal data                              |                                                               |
|-------------------------------------------|---------------------------------------------------------------|
| Empirical formula                         | C <sub>11</sub> H <sub>16</sub> N <sub>4</sub> O <sub>9</sub> |
| Formula weight                            | 348.28                                                        |
| Temperature/K                             | 150.0                                                         |
| Crystal system                            | monoclinic                                                    |
| Space group                               | P2 <sub>1</sub> /c                                            |
| a/Å                                       | 14.8686(7)                                                    |
| b/Å                                       | 15.1485(7)                                                    |
| c/Å                                       | 6.5200(3)                                                     |
| α/°                                       | 90                                                            |
| β/°                                       | 97.598(4)                                                     |
| γ/°                                       | 90                                                            |
| Volume/Å <sup>3</sup>                     | 1455.65(12)                                                   |
| Z                                         | 4                                                             |
| ρ <sub>calc</sub> /g/cm <sup>3</sup>      | 1.589                                                         |
| μ/mm <sup>-1</sup>                        | 1.217                                                         |
| F(000)                                    | 728.0                                                         |
| Crystal size/mm <sup>3</sup>              | 0.21 × 0.11 × 0.05                                            |
| Radiation                                 | CuKα (λ = 1.54184 Å)                                          |
| 2θ range for data collection/°            | 5.834 to 141.292                                              |
| Index ranges                              | -18 ≤ h ≤ 18, -18 ≤ k ≤ 18, -7 ≤ l ≤ 7                        |
| Reflections collected                     | 27139                                                         |
| Independent reflections                   | 2695 [R <sub>int</sub> = 0.1182, R <sub>sigma</sub> = 0.0519] |
| Data/restraints/parameters                | 2695/1/256                                                    |
| Goodness-of-fit on F <sup>2</sup>         | 1.054                                                         |
| Final R indexes [I ≥ 2σ (I)]              | R <sub>1</sub> = 0.0790, wR <sub>2</sub> = 0.1973             |
| Largest diff. peak/hole/e Å <sup>-3</sup> | 0.49/-0.37                                                    |

**Table S1.** Summary of crystallographic data for Theophylline Squarate trihydrate (TS3w).

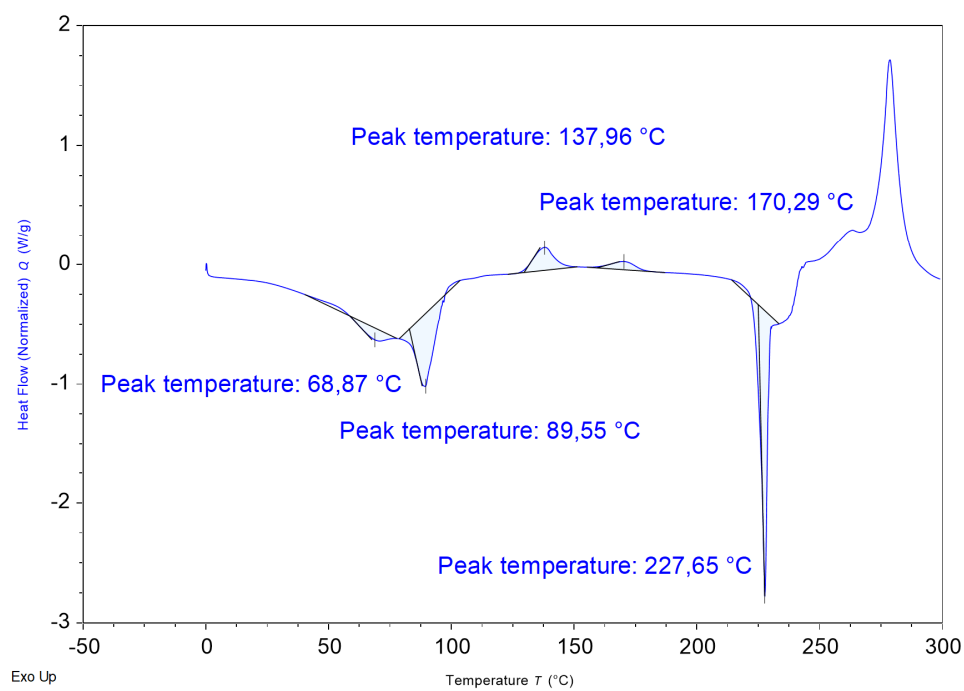

Figure S1. DSC thermogram of TS3w (10°C/min).

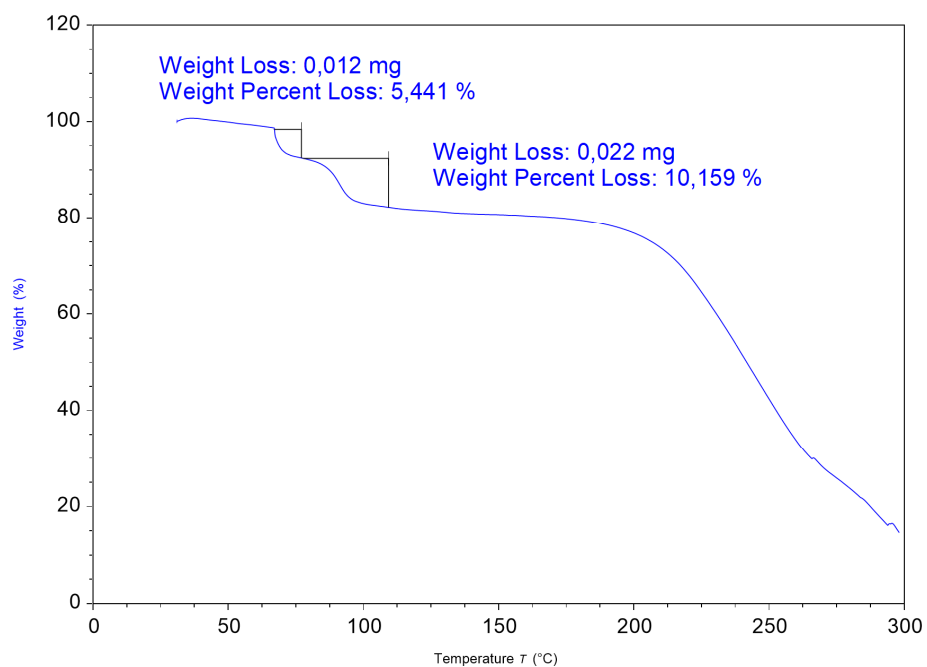

Figure S2. TGA thermogram of TS3w (10°C/min).

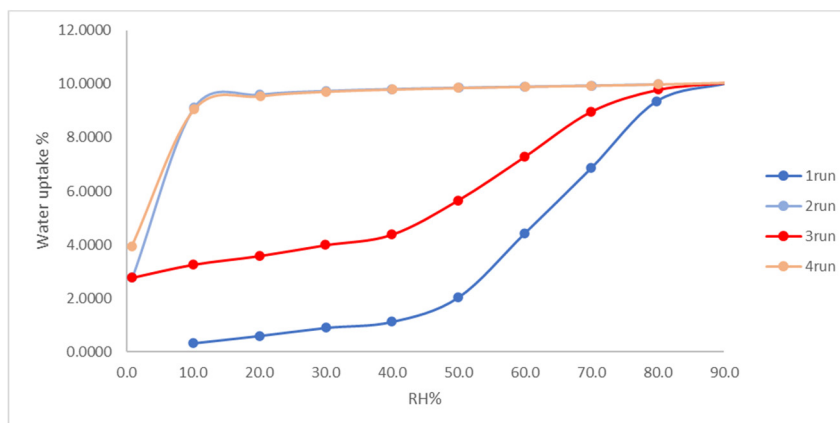

**Figure S3.** DVS of TS3w. The hysteresis represents the gain and the loss of the channel water molecule.

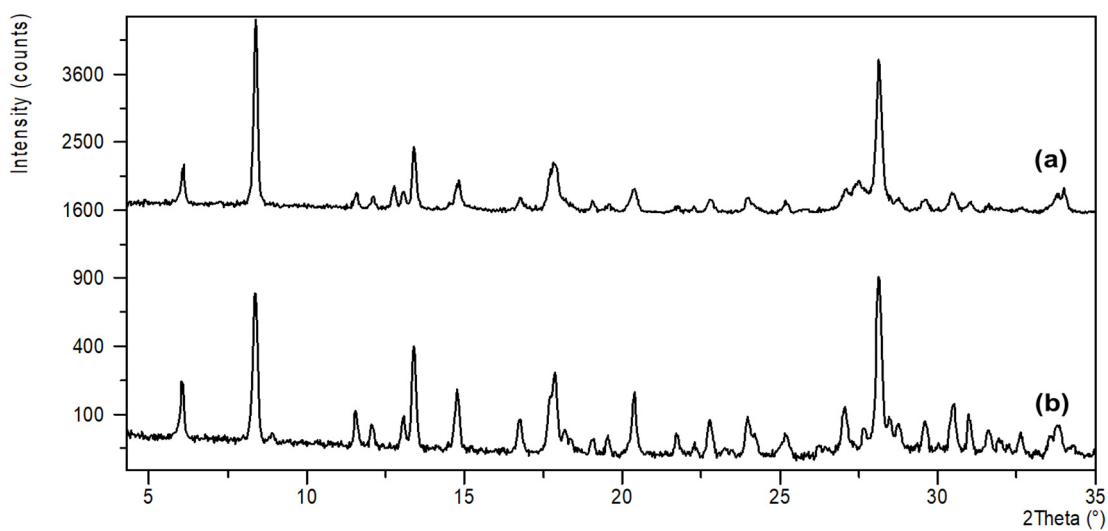

**Figure S4.** XRPD of TS3w after DVS (a) compared to its pattern before DVS (b).

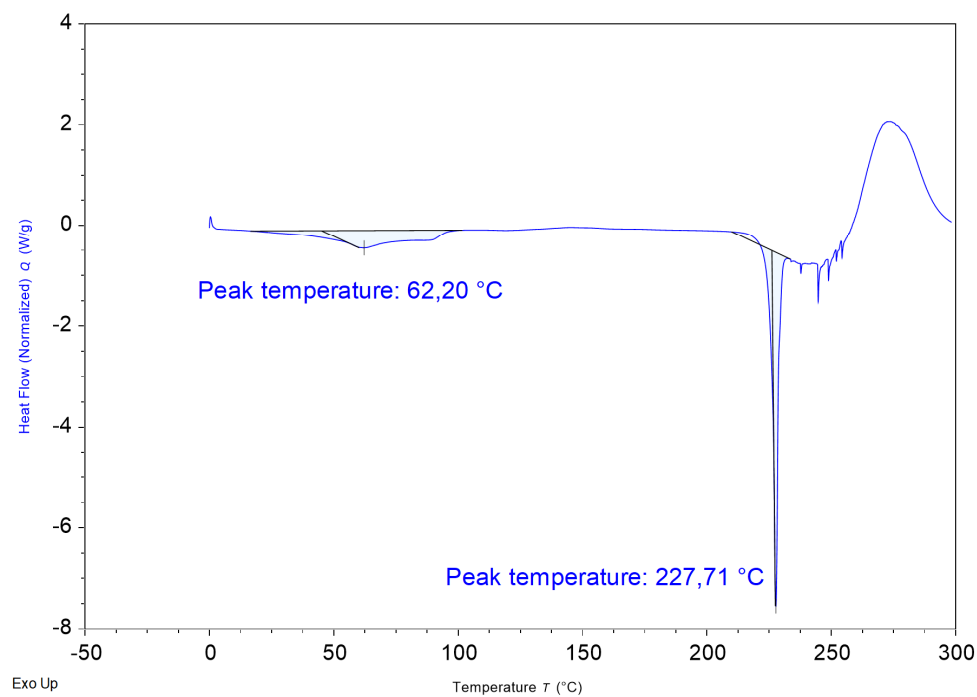

**Figure S5.** DSC thermogram of TSan (10°C/min).

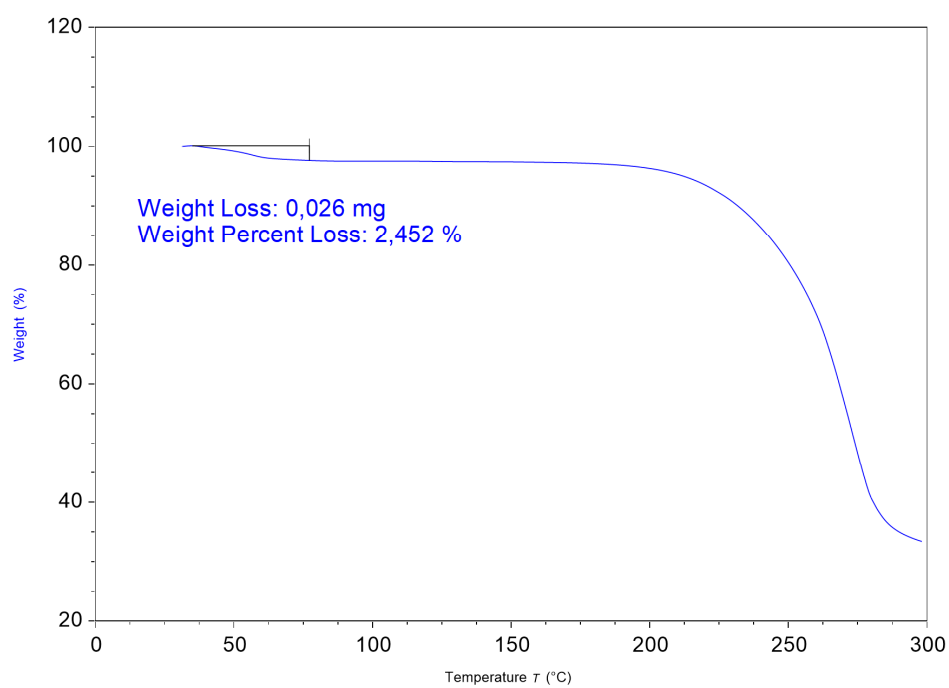

**Figure S6.** TGA thermogram of TSan (10°C/min).

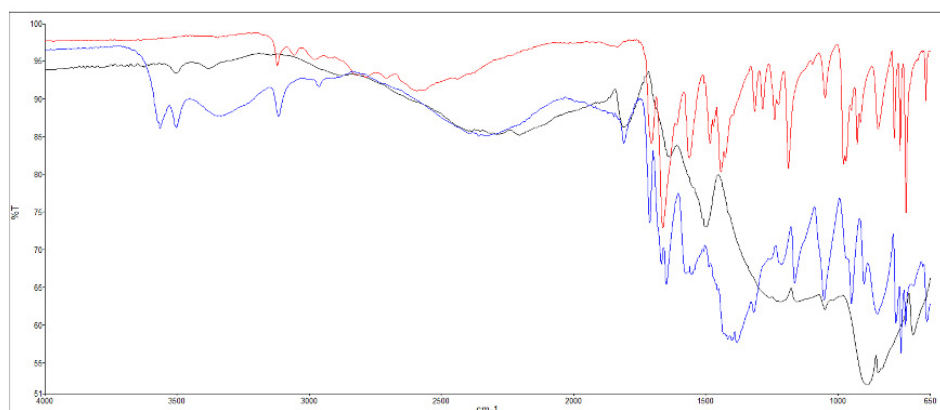

**Figure S7.** FTIR spectra of Theophylline (red), Squaric Acid (black) and Theophylline squarate trihydrate (blue).

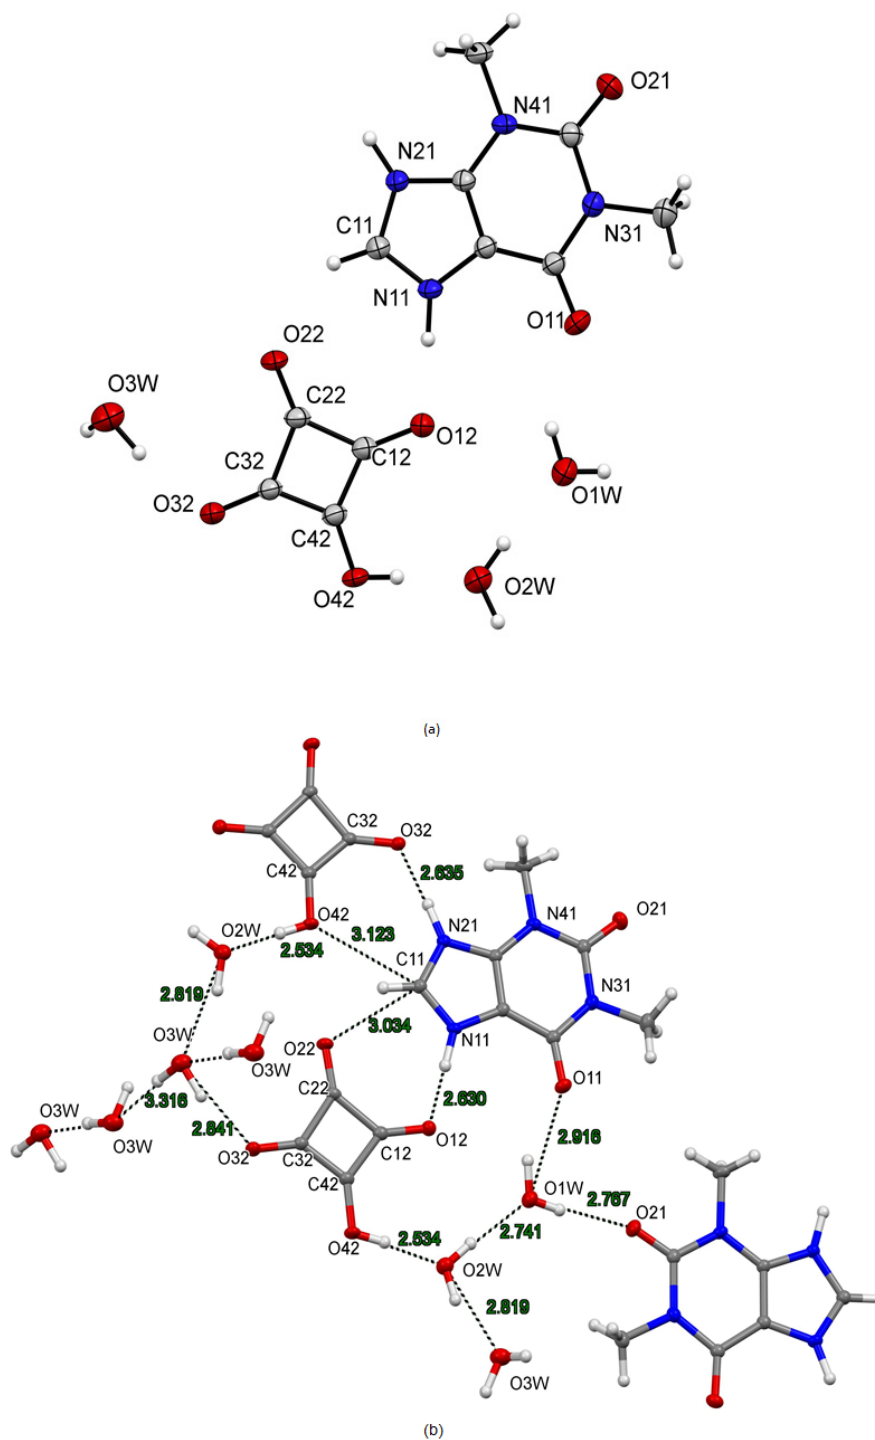

**Figure S8.** Asymmetric unit of Theophylline squarate trihydrate (**a**) and molecular structure highlighting the HB connections and distances (**b**).

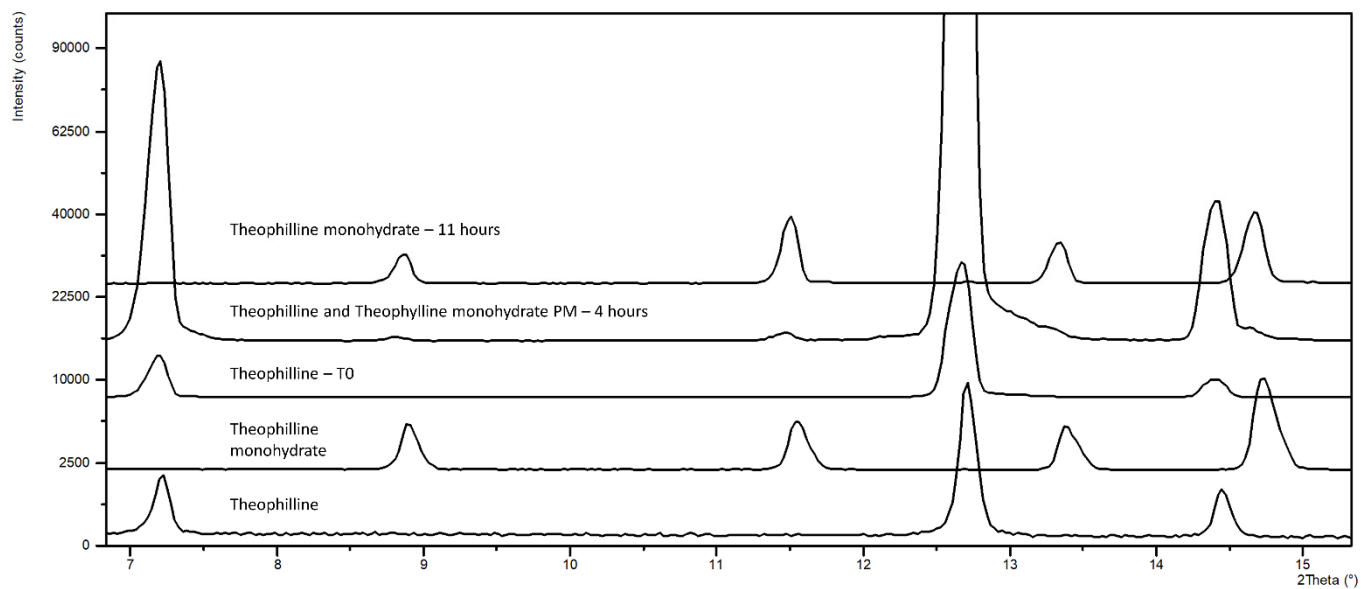

**Figure S9.** VH-XRPD of pure Theophylline.
